# Supplementary material for: Analysis of high fat diet induced genes during mammary gland development: identifying role players in poor prognosis of breast cancer
Source: PubMed Central journal article supplement (PMC4153917; doi:10.1186/1756-0500-7-543), 2014-08-18
Supplement: 13104_2014_3097_MOESM1_ESM.pdf [file 13104_2014_3097_MOESM1_ESM.pdf]

Additional File 1. 361 Breast Cancer Gene Sets that were Utilized in GSEA

| NAME                                            | ORIGINAL SIZE | AFTER RESTRICTING TO DATASET | STATUS    |
|-------------------------------------------------|---------------|------------------------------|-----------|
| AIGNER_ZEB1_TARGETS                             | 35            |                              | 28        |
| AIYAR_COBRA1_TARGETS_DN                         | 29            |                              | 22        |
| AIYAR_COBRA1_TARGETS_UP                         | 39            |                              | 31        |
| BAE_BRCA1_TARGETS_DN                            | 32            |                              | 29        |
| BAE_BRCA1_TARGETS_UP                            | 75            |                              | 64        |
| BCAT_BILD_ET_AL_DN                              | 46            |                              | 33        |
| BCAT_BILD_ET_AL_UP                              | 49            |                              | 32        |
| BECKER_TAMOXIFEN_RESISTANCE_DN                  | 52            |                              | 39        |
| BECKER_TAMOXIFEN_RESISTANCE_UP                  | 50            |                              | 44        |
| BENPORATH_CYCLING_GENES                         | 648           |                              | 457       |
| BENPORATH_EED_TARGETS                           | 1062          |                              | 712       |
| BENPORATH_ES_1                                  | 379           |                              | 281       |
| BENPORATH_ES_2                                  | 40            |                              | 25        |
| BENPORATH_ES_CORE_NINE                          | 9             |                              | 8         |
| BENPORATH_ES_CORE_NINE_CORRELATED               | 100           |                              | 84        |
| BENPORATH_ES_WITH_H3K27ME3                      | 1118          |                              | 776       |
| BENPORATH_MYC_MAX_TARGETS                       | 775           |                              | 599       |
| BENPORATH_MYC_TARGETS_WITH_EBOX                 | 230           |                              | 197       |
| BENPORATH_NANOG_TARGETS                         | 988           |                              | 694       |
| BENPORATH_NOS_TARGETS                           | 179           |                              | 132       |
| BENPORATH_OCT4_TARGETS                          | 290           |                              | 214       |
| BENPORATH_PRC2_TARGETS                          | 652           |                              | 449       |
| BENPORATH_PROLIFERATION                         | 147           |                              | 118       |
| BENPORATH_SOX2_TARGETS                          | 734           |                              | 522       |
| BENPORATH_SUZ12_TARGETS                         | 1038          |                              | 698       |
| BERTUCCI_MEDULLARY_VS_DUCTAL_BREAST_CANCER_DN   | 169           |                              | 119       |
| BERTUCCI_MEDULLARY_VS_DUCTAL_BREAST_CANCER_UP   | 206           |                              | 142       |
| BHAT_ESR1_TARGETS_NOT_VIA_AKT1_DN               | 88            |                              | 69        |
| BHAT_ESR1_TARGETS_NOT_VIA_AKT1_UP               | 211           |                              | 147       |
| BHAT_ESR1_TARGETS_VIA_AKT1_DN                   | 82            |                              | 61        |
| BHAT_ESR1_TARGETS_VIA_AKT1_UP                   | 281           |                              | 187       |
| BHATI_G2M_ARREST_BY_2METHOXYESTRADIOL_DN        | 127           |                              | 88        |
| BHATI_G2M_ARREST_BY_2METHOXYESTRADIOL_UP        | 125           |                              | 86        |
| BIOCARTA_ATRBRCA_PATHWAY                        | 21            |                              | 18        |
| BIOCARTA_HER2_PATHWAY                           | 22            |                              | 20        |
| BIOCARTA_STATHMIN_PATHWAY                       | 19            |                              | 16        |
| CAFFAREL_RESPONSE_TO_THC_24HR_3_DN              | 13            |                              | 10        |
| CAFFAREL_RESPONSE_TO_THC_24HR_3_UP              | 8             |                              | 6         |
| CAFFAREL_RESPONSE_TO_THC_24HR_5_DN              | 59            |                              | 45        |
| CAFFAREL_RESPONSE_TO_THC_24HR_5_UP              | 34            |                              | 26        |
| CAFFAREL_RESPONSE_TO_THC_8HR_3_DN               | 10            |                              | 7         |
| CAFFAREL_RESPONSE_TO_THC_8HR_3_UP               | 5             |                              | Rejected! |
| CAFFAREL_RESPONSE_TO_THC_8HR_5_DN               | 11            |                              | 8         |
| CAFFAREL_RESPONSE_TO_THC_8HR_5_UP               | 16            |                              | 10        |
| CAFFAREL_RESPONSE_TO_THC_DN                     | 31            |                              | 23        |
| CAFFAREL_RESPONSE_TO_THC_UP                     | 33            |                              | 25        |
| CHARAFE_BREAST_CANCER_BASAL_VS_MESENCHYMAL_DN   | 50            |                              | 35        |
| CHARAFE_BREAST_CANCER_BASAL_VS_MESENCHYMAL_UP   | 121           |                              | 76        |
| CHARAFE_BREAST_CANCER_LUMINAL_VS_BASAL_DN       | 455           |                              | 337       |
| CHARAFE_BREAST_CANCER_LUMINAL_VS_BASAL_UP       | 380           |                              | 230       |
| CHARAFE_BREAST_CANCER_LUMINAL_VS_MESENCHYMAL_DN | 460           |                              | 325       |
| CHARAFE_BREAST_CANCER_LUMINAL_VS_MESENCHYMAL_UP | 450           |                              | 293       |
| CHEN_HOXA5_TARGETS_6HR_DN                       | 6             |                              | Rejected! |
| CHEN_HOXA5_TARGETS_6HR_UP                       | 10            |                              | 8         |
| CHEN_HOXA5_TARGETS_9HR_DN                       | 41            |                              | 31        |
| CHEN_HOXA5_TARGETS_9HR_UP                       | 223           |                              | 147       |
| CHENG_IMPRINTED_BY_ESTRADIOL                    | 110           |                              | 71        |
| CHIN_BREAST_CANCER_COPY_NUMBER_DN               | 16            |                              | 11        |
| CHIN_BREAST_CANCER_COPY_NUMBER_UP               | 27            |                              | 23        |
| CHUANG_OXIDATIVE_STRESS_RESPONSE_DN             | 11            |                              | 10        |
| CHUANG_OXIDATIVE_STRESS_RESPONSE_UP             | 28            |                              | 24        |
| CLIMENT_BREAST_CANCER_COPY_NUMBER_DN            | 8             |                              | 6         |
| CLIMENT_BREAST_CANCER_COPY_NUMBER_UP            | 23            |                              | 21        |
| CORDENONSI_YAP_CONSERVED_SIGNATURE              | 57            |                              | 49        |
| CREIGHTON_AKT1_SIGNALING_VIA_MTOR_DN            | 23            |                              | 18        |
| CREIGHTON_AKT1_SIGNALING_VIA_MTOR_UP            | 34            |                              | 26        |
| CREIGHTON_ENDOCRINE_THERAPY_RESISTANCE_1        | 528           |                              | 357       |
| CREIGHTON_ENDOCRINE_THERAPY_RESISTANCE_2        | 473           |                              | 210       |
| CREIGHTON_ENDOCRINE_THERAPY_RESISTANCE_3        | 720           |                              | 477       |
| CREIGHTON_ENDOCRINE_THERAPY_RESISTANCE_4        | 307           |                              | 202       |
| CREIGHTON_ENDOCRINE_THERAPY_RESISTANCE_5        | 482           |                              | 324       |
| DAIRKEE_CANCER_PRONE_RESPONSE_BPA               | 51            |                              | 44        |
| DAIRKEE_CANCER_PRONE_RESPONSE_BPA_E2            | 118           |                              | 97        |
| DAIRKEE_CANCER_PRONE_RESPONSE_E2                | 28            |                              | 23        |
| DAIRKEE_TERT_TARGETS_DN                         | 124           |                              | 81        |
| DAIRKEE_TERT_TARGETS_UP                         | 380           |                              | 271       |
| DITTMER_PTHLH_TARGETS_DN                        | 73            |                              | 59        |

|                                                    |      |           |
|----------------------------------------------------|------|-----------|
| DITTMER_PTHLH_TARGETS_UP                           | 112  | 97        |
| DOANE_BREAST_CANCER_CLASSES_DN                     | 34   | 30        |
| DOANE_BREAST_CANCER_CLASSES_UP                     | 72   | 44        |
| DOANE_BREAST_CANCER_ESR1_DN                        | 48   | 41        |
| DOANE_BREAST_CANCER_ESR1_UP                        | 112  | 83        |
| DOANE_RESPONSE_TO_ANDROGEN_DN                      | 241  | 182       |
| DOANE_RESPONSE_TO_ANDROGEN_UP                      | 184  | 108       |
| E2F3_UP.V1_DN                                      | 183  | 73        |
| E2F3_UP.V1_UP                                      | 196  | 120       |
| EINAV_INTERFERON_SIGNATURE_IN_CANCER               | 27   | 19        |
| ENGELMANN_CANCER_PROGENITORS_DN                    | 70   | 40        |
| ENGELMANN_CANCER_PROGENITORS_UP                    | 48   | 42        |
| FARMER_BREAST_CANCER_APOCRINE_VS_BASAL             | 330  | 245       |
| FARMER_BREAST_CANCER_APOCRINE_VS_LUMINAL           | 326  | 235       |
| FARMER_BREAST_CANCER_BASAL_VS_LUMINAL              | 330  | 241       |
| FARMER_BREAST_CANCER_CLUSTER_1                     | 44   | 25        |
| FARMER_BREAST_CANCER_CLUSTER_2                     | 33   | 30        |
| FARMER_BREAST_CANCER_CLUSTER_4                     | 16   | 14        |
| FARMER_BREAST_CANCER_CLUSTER_5                     | 19   | 18        |
| FARMER_BREAST_CANCER_CLUSTER_6                     | 16   | 14        |
| FARMER_BREAST_CANCER_CLUSTER_7                     | 20   | 13        |
| FARMER_BREAST_CANCER_CLUSTER_8                     | 7    | Rejected! |
| FINAK_BREAST_CANCER_SDPD_SIGNATURE                 | 26   | 21        |
| FINETTI_BREAST_CANCER_KINOME_GREEN                 | 16   | 15        |
| FINETTI_BREAST_CANCER_KINOME_RED                   | 16   | 15        |
| FINETTI_BREAST_CANCERS_KINOME_BLUE                 | 21   | 17        |
| FINETTI_BREAST_CANCERS_KINOME_GRAY                 | 15   | 13        |
| FOURNIER_ACINAR_DEVELOPMENT_EARLY_DN               | 6    | Rejected! |
| FOURNIER_ACINAR_DEVELOPMENT_EARLY_UP               | 21   | 13        |
| FOURNIER_ACINAR_DEVELOPMENT_LATE_2                 | 277  | 216       |
| FOURNIER_ACINAR_DEVELOPMENT_LATE_DN                | 21   | 19        |
| FOURNIER_ACINAR_DEVELOPMENT_LATE_UP                | 11   | 9         |
| FRASOR_RESPONSE_TO ESTRADIOL_DN                    | 82   | 65        |
| FRASOR_RESPONSE_TO ESTRADIOL_UP                    | 37   | 32        |
| FRASOR_RESPONSE_TO_SERM_OR_FULVESTRANT_DN          | 50   | 46        |
| FRASOR_RESPONSE_TO_SERM_OR_FULVESTRANT_UP          | 24   | 14        |
| FRASOR_TAMOXIFEN_RESPONSE_DN                       | 11   | 8         |
| FRASOR_TAMOXIFEN_RESPONSE_UP                       | 51   | 38        |
| FUJII_YBX1_TARGETS_DN                              | 202  | 170       |
| FUJII_YBX1_TARGETS_UP                              | 43   | 31        |
| GINESTIER_BREAST_CANCER_20Q13_AMPLIFICATION_DN     | 180  | 101       |
| GINESTIER_BREAST_CANCER_20Q13_AMPLIFICATION_UP     | 119  | 79        |
| GINESTIER_BREAST_CANCER_ZNF217_AMPLIFIED_DN        | 335  | 184       |
| GINESTIER_BREAST_CANCER_ZNF217_AMPLIFIED_UP        | 78   | 51        |
| GRAESSMANN_APOPTOSIS_BY_DOXORUBICIN_DN             | 1781 | Rejected! |
| GRAESSMANN_APOPTOSIS_BY_DOXORUBICIN_UP             | 1142 | 861       |
| GRAESSMANN_APOPTOSIS_BY_SERUM_DEPRIVATION_DN       | 234  | 182       |
| GRAESSMANN_APOPTOSIS_BY_SERUM_DEPRIVATION_UP       | 552  | 422       |
| GRAESSMANN_RESPONSE_TO_MC_AND_DOXORUBICIN_DN       | 770  | 558       |
| GRAESSMANN_RESPONSE_TO_MC_AND_DOXORUBICIN_UP       | 612  | 470       |
| GRAESSMANN_RESPONSE_TO_MC_AND_SERUM_DEPRIVATION_DN | 84   | 66        |
| GRAESSMANN_RESPONSE_TO_MC_AND_SERUM_DEPRIVATION_UP | 211  | 167       |
| GU_PDEF_TARGETS_DN                                 | 39   | 28        |
| GU_PDEF_TARGETS_UP                                 | 71   | 64        |
| GYORFFY_DOXORUBICIN_RESISTANCE                     | 56   | 35        |
| GYORFFY_MITOXANTRONE_RESISTANCE                    | 57   | 36        |
| HAN_SATB1_TARGETS_DN                               | 442  | 319       |
| HAN_SATB1_TARGETS_UP                               | 395  | 274       |
| HEDENFALK_BREAST_CANCER_BRACX_DN                   | 20   | 15        |
| HEDENFALK_BREAST_CANCER_BRACX_UP                   | 20   | 14        |
| HEDENFALK_BREAST_CANCER_BRCA1_VS_BRCA2             | 163  | 130       |
| HEDENFALK_BREAST_CANCER_HEREDITARY_VS_SPORADIC     | 50   | 38        |
| HERNANDEZ_ABERRANT_MITOSIS_BY_DOCETAXEL_2NM_DN     | 25   | 21        |
| HERNANDEZ_ABERRANT_MITOSIS_BY_DOCETAXEL_2NM_UP     | 81   | 58        |
| HERNANDEZ_ABERRANT_MITOSIS_BY_DOCETAXEL_4NM_DN     | 7    | 7         |
| HERNANDEZ_ABERRANT_MITOSIS_BY_DOCETAXEL_4NM_UP     | 23   | 16        |
| HERNANDEZ_MITOTIC_ARREST_BY_DOCETAXEL_1_DN         | 38   | 31        |
| HERNANDEZ_MITOTIC_ARREST_BY_DOCETAXEL_1_UP         | 36   | 25        |
| HERNANDEZ_MITOTIC_ARREST_BY_DOCETAXEL_2_DN         | 19   | 10        |
| HERNANDEZ_MITOTIC_ARREST_BY_DOCETAXEL_2_UP         | 64   | 49        |
| HESSON_TUMOR_SUPPRESSOR_CLUSTER_3P21_3             | 7    | 6         |
| HOFFMAN_CLOCK_TARGETS_DN                           | 10   | 8         |
| HOFFMAN_CLOCK_TARGETS_UP                           | 11   | 8         |
| HONMA_DOCETAXEL_RESISTANCE                         | 34   | 26        |
| HONRADO_BREAST_CANCER_BRCA1_VS_BRCA2               | 18   | 16        |
| HOOI_ST7_TARGETS_DN                                | 123  | 67        |
| HOOI_ST7_TARGETS_UP                                | 94   | 56        |
| HUANG_DASATINIB_RESISTANCE_DN                      | 69   | 48        |
| HUANG_DASATINIB_RESISTANCE_UP                      | 81   | 63        |
| HUPER_BREAST_BASAL_VS_LUMINAL_DN                   | 59   | 43        |
| HUPER_BREAST_BASAL_VS_LUMINAL_UP                   | 54   | 38        |

|                                                |     |           |
|------------------------------------------------|-----|-----------|
| IYENGAR_RESPONSE_TO_ADIPOCYTE_FACTORS          | 10  | 9         |
| JAZAERI_BREAST_CANCER_BRCA1_VS_BRCA2_DN        | 43  | 34        |
| JAZAERI_BREAST_CANCER_BRCA1_VS_BRCA2_UP        | 49  | 38        |
| JOHNSTONE_PARVB_TARGETS_1_DN                   | 63  | 42        |
| JOHNSTONE_PARVB_TARGETS_1_UP                   | 7   | Rejected! |
| JOHNSTONE_PARVB_TARGETS_2_DN                   | 336 | 228       |
| JOHNSTONE_PARVB_TARGETS_2_UP                   | 140 | 104       |
| JOHNSTONE_PARVB_TARGETS_3_DN                   | 918 | 602       |
| JOHNSTONE_PARVB_TARGETS_3_UP                   | 430 | 306       |
| KEGG_HOMOLOGOUS_RECOMBINATION                  | 28  | 23        |
| KRAS.600.LUNG.BREAST_UP.V1_DN                  | 289 | 186       |
| KRAS.600.LUNG.BREAST_UP.V1_UP                  | 288 | 183       |
| KRAS.BREAST_UP.V1_DN                           | 145 | 81        |
| KRAS.BREAST_UP.V1_UP                           | 146 | 92        |
| KRAS.LUNG.BREAST_UP.V1_DN                      | 145 | 92        |
| KRAS.LUNG.BREAST_UP.V1_UP                      | 145 | 95        |
| LANDEMAINE_LUNG_METASTASIS                     | 21  | 13        |
| LANDIS_ERBB2_BREAST_PRENEOPLASTIC_DN           | 55  | 45        |
| LANDIS_ERBB2_BREAST_PRENEOPLASTIC_UP           | 20  | 17        |
| LANDIS_ERBB2_BREAST_TUMORS_324_DN              | 149 | 123       |
| LANDIS_ERBB2_BREAST_TUMORS_324_UP              | 150 | 121       |
| LANDIS_ERBB2_BREAST_TUMORS_65_DN               | 37  | 32        |
| LANDIS_ERBB2_BREAST_TUMORS_65_UP               | 22  | 18        |
| LE_SKI_TARGETS_DN                              | 8   | 7         |
| LE_SKI_TARGETS_UP                              | 17  | 13        |
| LIEN_BREAST_CARCINOMA_METAPLASTIC              | 35  | 32        |
| LIEN_BREAST_CARCINOMA_METAPLASTIC_VS_DUCTAL_DN | 114 | 65        |
| LIEN_BREAST_CARCINOMA_METAPLASTIC_VS_DUCTAL_UP | 83  | 63        |
| LIU_BREAST_CANCER                              | 30  | 19        |
| LIU_COMMON_CANCER_GENES                        | 79  | 43        |
| LIU_LIVER_CANCER                               | 38  | 26        |
| LIU_NASOPHARYNGEAL_CARCINOMA                   | 70  | 51        |
| LIU_TOPBP1_TARGETS                             | 16  | 9         |
| MACLACHLAN_BRCA1_TARGETS_DN                    | 16  | 14        |
| MACLACHLAN_BRCA1_TARGETS_UP                    | 21  | 17        |
| MAEKAWA_ATF2_TARGETS                           | 24  | 20        |
| MARCHINI_TRABECTEDIN_RESISTANCE_DN             | 49  | 38        |
| MARCHINI_TRABECTEDIN_RESISTANCE_UP             | 21  | 17        |
| MASSARWEH_RESPONSE_TO ESTRADIOL                | 61  | 44        |
| MASSARWEH_TAMOXIFEN_RESISTANCE_DN              | 258 | 159       |
| MASSARWEH_TAMOXIFEN_RESISTANCE_UP              | 578 | 375       |
| MCBRYAN_PUBERTAL_BREAST_3_4WK_DN               | 39  | 30        |
| MCBRYAN_PUBERTAL_BREAST_3_4WK_UP               | 214 | 172       |
| MCBRYAN_PUBERTAL_BREAST_4_5WK_DN               | 196 | 158       |
| MCBRYAN_PUBERTAL_BREAST_4_5WK_UP               | 271 | 228       |
| MCBRYAN_PUBERTAL_BREAST_5_6WK_DN               | 137 | 98        |
| MCBRYAN_PUBERTAL_BREAST_5_6WK_UP               | 116 | 99        |
| MCBRYAN_PUBERTAL_BREAST_6_7WK_DN               | 79  | 68        |
| MCBRYAN_PUBERTAL_BREAST_6_7WK_UP               | 197 | 151       |
| MCBRYAN_PUBERTAL_TGFB1_TARGETS_DN              | 62  | 58        |
| MCBRYAN_PUBERTAL_TGFB1_TARGETS_UP              | 169 | 151       |
| MCBRYAN_TERMINAL_END_BUD_DN                    | 7   | Rejected! |
| MCBRYAN_TERMINAL_END_BUD_UP                    | 12  | 10        |
| MIKI_COEXPRESSED_WITH_CYP19A1                  | 7   | 7         |
| MISHRA_CARCINOMA_ASSOCIATED_FIBROBLAST_DN      | 24  | 19        |
| MISHRA_CARCINOMA_ASSOCIATED_FIBROBLAST_UP      | 24  | 18        |
| MORF_BRCA1                                     | 264 | 195       |
| MYC_UP.V1_DN                                   | 182 | 78        |
| MYC_UP.V1_UP                                   | 186 | 97        |
| NADERI_BREAST_CANCER_PROGNOSIS_DN              | 18  | 17        |
| NADERI_BREAST_CANCER_PROGNOSIS_UP              | 50  | 39        |
| NAGASHIMA_EGF_SIGNALING_UP                     | 58  | 49        |
| NAGASHIMA_NRG1_SIGNALING_DN                    | 58  | 36        |
| NAGASHIMA_NRG1_SIGNALING_UP                    | 176 | 149       |
| NAM_FXYD5_TARGETS_DN                           | 18  | 17        |
| NIKOLSKY_BREAST_CANCER_10Q22_AMPLICON          | 9   | 5         |
| NIKOLSKY_BREAST_CANCER_11Q12_Q14_AMPLICON      | 158 | 98        |
| NIKOLSKY_BREAST_CANCER_12Q13_Q21_AMPLICON      | 46  | 34        |
| NIKOLSKY_BREAST_CANCER_12Q24_AMPLICON          | 15  | 9         |
| NIKOLSKY_BREAST_CANCER_14Q22_AMPLICON          | 14  | 12        |
| NIKOLSKY_BREAST_CANCER_15Q26_AMPLICON          | 22  | 10        |
| NIKOLSKY_BREAST_CANCER_16P13_AMPLICON          | 120 | 68        |
| NIKOLSKY_BREAST_CANCER_16Q24_AMPLICON          | 53  | 32        |
| NIKOLSKY_BREAST_CANCER_17P11_AMPLICON          | 10  | 9         |
| NIKOLSKY_BREAST_CANCER_17Q11_Q21_AMPLICON      | 133 | 80        |
| NIKOLSKY_BREAST_CANCER_17Q21_Q25_AMPLICON      | 335 | 200       |
| NIKOLSKY_BREAST_CANCER_19P13_AMPLICON          | 5   | 5         |
| NIKOLSKY_BREAST_CANCER_19Q13.1_AMPLICON        | 22  | Rejected! |
| NIKOLSKY_BREAST_CANCER_19Q13.4_AMPLICON        | 7   | Rejected! |
| NIKOLSKY_BREAST_CANCER_1Q21_AMPLICON           | 38  | 31        |
| NIKOLSKY_BREAST_CANCER_1Q32_AMPLICON           | 13  | 10        |

|                                                   |      |           |
|---------------------------------------------------|------|-----------|
| NIKOLSKY_BREAST_CANCER_20P13_AMPLICON             | 8    | 7         |
| NIKOLSKY_BREAST_CANCER_20Q11_AMPLICON             | 31   | 22        |
| NIKOLSKY_BREAST_CANCER_20Q12_Q13_AMPLICON         | 149  | 85        |
| NIKOLSKY_BREAST_CANCER_21Q22_AMPLICON             | 16   | 12        |
| NIKOLSKY_BREAST_CANCER_22Q13_AMPLICON             | 17   | 8         |
| NIKOLSKY_BREAST_CANCER_5P15_AMPLICON              | 26   | 20        |
| NIKOLSKY_BREAST_CANCER_6P24_P22_AMPLICON          | 21   | 13        |
| NIKOLSKY_BREAST_CANCER_7P15_AMPLICON              | 11   | 11        |
| NIKOLSKY_BREAST_CANCER_7P22_AMPLICON              | 38   | 23        |
| NIKOLSKY_BREAST_CANCER_7Q21_Q22_AMPLICON          | 76   | 44        |
| NIKOLSKY_BREAST_CANCER_8P12_P11_AMPLICON          | 57   | 38        |
| NIKOLSKY_BREAST_CANCER_8Q12_Q22_AMPLICON          | 132  | 86        |
| NIKOLSKY_BREAST_CANCER_8Q23_Q24_AMPLICON          | 157  | 87        |
| NIKOLSKY_MUTATED_AND_AMPLIFIED_IN_BREAST_CANCER   | 94   | 56        |
| NIKOLSKY_OVERCONNECTED_IN_BREAST_CANCER           | 22   | 19        |
| PACHER_TARGETS_OF_IGF1_AND_IGF2_UP                | 35   | 30        |
| PECE_MAMMARY_STEM_CELL_DN                         | 146  | 102       |
| PECE_MAMMARY_STEM_CELL_UP                         | 146  | 99        |
| PEDERSEN_METASTASIS_BY_ERBB2_ISOFORM_1            | 46   | 37        |
| PEDERSEN_METASTASIS_BY_ERBB2_ISOFORM_3            | 20   | 13        |
| PEDERSEN_METASTASIS_BY_ERBB2_ISOFORM_4            | 110  | 77        |
| PEDERSEN_METASTASIS_BY_ERBB2_ISOFORM_5            | 11   | 8         |
| PEDERSEN_METASTASIS_BY_ERBB2_ISOFORM_6            | 29   | 20        |
| PEDERSEN_METASTASIS_BY_ERBB2_ISOFORM_7            | 403  | 273       |
| PEDERSEN_TARGETS_OF_611CTF_ISOFORM_OF_ERBB2       | 76   | 55        |
| POOLA_INVASIVE_BREAST_CANCER_DN                   | 134  | 97        |
| POOLA_INVASIVE_BREAST_CANCER_UP                   | 288  | 215       |
| PUJANA_ATM_PCC_NETWORK                            | 1442 | Rejected! |
| PUJANA_BRCA1_PCC_NETWORK                          | 1652 | Rejected! |
| PUJANA_BRCA2_PCC_NETWORK                          | 423  | 336       |
| PUJANA_BRCA_CENTERED_NETWORK                      | 117  | 103       |
| PUJANA_BREAST_CANCER_LIT_INT_NETWORK              | 101  | 88        |
| PUJANA_BREAST_CANCER_WITH_BRCA1_MUTATED_DN        | 9    | 6         |
| PUJANA_BREAST_CANCER_WITH_BRCA1_MUTATED_UP        | 56   | 48        |
| PUJANA_CHEK2_PCC_NETWORK                          | 779  | 603       |
| PUJANA_XPRSS_INT_NETWORK                          | 168  | 138       |
| RAY_TUMORIGENESIS_BY_ERBB2_CDC25A_DN              | 159  | 125       |
| RAY_TUMORIGENESIS_BY_ERBB2_CDC25A_UP              | 104  | 80        |
| RIGGINS_TAMOXIFEN_RESISTANCE_DN                   | 220  | 174       |
| RIGGINS_TAMOXIFEN_RESISTANCE_UP                   | 66   | 58        |
| RIZKI_TUMOR_INVASIVENESS_2D_DN                    | 64   | 56        |
| RIZKI_TUMOR_INVASIVENESS_2D_UP                    | 69   | 56        |
| RIZKI_TUMOR_INVASIVENESS_3D_DN                    | 270  | 201       |
| RIZKI_TUMOR_INVASIVENESS_3D_UP                    | 210  | 163       |
| ROYLANCE_BREAST_CANCER_16Q_COPY_NUMBER_DN         | 26   | 16        |
| ROYLANCE_BREAST_CANCER_16Q_COPY_NUMBER_UP         | 63   | 33        |
| SCHUETZ_BREAST_CANCER_DUCTAL_INVASIVE_DN          | 84   | 68        |
| SCHUETZ_BREAST_CANCER_DUCTAL_INVASIVE_UP          | 351  | 266       |
| SEITZ_NEOPLASTIC_TRANSFORMATION_BY_8P_DELETION_DN | 30   | 27        |
| SEITZ_NEOPLASTIC_TRANSFORMATION_BY_8P_DELETION_UP | 73   | 54        |
| SMID_BREAST_CANCER_BASAL_DN                       | 701  | 476       |
| SMID_BREAST_CANCER_BASAL_UP                       | 648  | 493       |
| SMID_BREAST_CANCER_ERBB2_DN                       | 5    | Rejected! |
| SMID_BREAST_CANCER_ERBB2_UP                       | 147  | 98        |
| SMID_BREAST_CANCER_LUMINAL_A_DN                   | 18   | 15        |
| SMID_BREAST_CANCER_LUMINAL_A_UP                   | 84   | 63        |
| SMID_BREAST_CANCER_LUMINAL_B_DN                   | 564  | 412       |
| SMID_BREAST_CANCER_LUMINAL_B_UP                   | 172  | 121       |
| SMID_BREAST_CANCER_NORMAL_LIKE_DN                 | 6    | 5         |
| SMID_BREAST_CANCER_NORMAL_LIKE_UP                 | 476  | 348       |
| SMID_BREAST_CANCER_RELAPSE_IN_BONE_DN             | 315  | 238       |
| SMID_BREAST_CANCER_RELAPSE_IN_BONE_UP             | 97   | 64        |
| SMID_BREAST_CANCER_RELAPSE_IN_BRAIN_DN            | 85   | 58        |
| SMID_BREAST_CANCER_RELAPSE_IN_BRAIN_UP            | 39   | 37        |
| SMID_BREAST_CANCER_RELAPSE_IN_LIVER_DN            | 10   | 10        |
| SMID_BREAST_CANCER_RELAPSE_IN_LIVER_UP            | 6    | 6         |
| SMID_BREAST_CANCER_RELAPSE_IN_LUNG_DN             | 37   | 25        |
| SMID_BREAST_CANCER_RELAPSE_IN_LUNG_UP             | 21   | 18        |
| SMID_BREAST_CANCER_RELAPSE_IN_PLEURA_DN           | 27   | 16        |
| SMID_BREAST_CANCER_RELAPSE_IN_PLEURA_UP           | 6    | 6         |
| SOTIRIOU_BREAST_CANCER_GRADE_1_VS_3_DN            | 52   | 35        |
| SOTIRIOU_BREAST_CANCER_GRADE_1_VS_3_UP            | 151  | 118       |
| SRC_UP.V1_DN                                      | 179  | 95        |
| SRC_UP.V1_UP                                      | 188  | 107       |
| STEIN_ESR1_TARGETS                                | 85   | 70        |
| STEIN_ESRRA_TARGETS                               | 535  | 379       |
| STEIN_ESRRA_TARGETS_DN                            | 105  | 65        |
| STEIN_ESRRA_TARGETS_RESPONSIVE_TO_ESTROGEN_DN     | 41   | 35        |
| STEIN_ESRRA_TARGETS_RESPONSIVE_TO_ESTROGEN_UP     | 31   | 21        |
| STEIN_ESRRA_TARGETS_UP                            | 388  | 286       |
| STEIN_ESTROGEN_RESPONSE_NOT_VIA_ESRRA             | 18   | 16        |

|                                                          |     |           |
|----------------------------------------------------------|-----|-----------|
| STREICHER_LSM1_TARGETS_DN                                | 19  | 15        |
| STREICHER_LSM1_TARGETS_UP                                | 44  | 37        |
| SUBTIL_PROGESTIN_TARGETS                                 | 36  | 29        |
| TAVAZOIE_METASTASIS                                      | 108 | 65        |
| THEODOROU_MAMMARY_TUMORIGENESIS                          | 31  | 24        |
| THILLAINADESAN_ZNF217_TARGETS_DN                         | 9   | 6         |
| THILLAINADESAN_ZNF217_TARGETS_UP                         | 44  | 31        |
| TURASHVILI_BREAST_CARCINOMA_DUCTAL_VS_LOBULAR_DN         | 7   | Rejected! |
| TURASHVILI_BREAST_CARCINOMA_DUCTAL_VS_LOBULAR_UP         | 21  | 13        |
| TURASHVILI_BREAST_DUCTAL_CARCINOMA_VS_DUCTAL_NORMAL_DN   | 198 | 132       |
| TURASHVILI_BREAST_DUCTAL_CARCINOMA_VS_DUCTAL_NORMAL_UP   | 44  | 35        |
| TURASHVILI_BREAST_DUCTAL_CARCINOMA_VS_LOBULAR_NORMAL_DN  | 69  | 45        |
| TURASHVILI_BREAST_DUCTAL_CARCINOMA_VS_LOBULAR_NORMAL_UP  | 73  | 57        |
| TURASHVILI_BREAST_LOBULAR_CARCINOMA_VS_DUCTAL_NORMAL_DN  | 91  | 63        |
| TURASHVILI_BREAST_LOBULAR_CARCINOMA_VS_DUCTAL_NORMAL_UP  | 69  | 53        |
| TURASHVILI_BREAST_LOBULAR_CARCINOMA_VS_LOBULAR_NORMAL_DN | 74  | 57        |
| TURASHVILI_BREAST_LOBULAR_CARCINOMA_VS_LOBULAR_NORMAL_UP | 94  | 66        |
| TURASHVILI_BREAST_NORMAL_DUCTAL_VS_LOBULAR_DN            | 7   | Rejected! |
| TURASHVILI_BREAST_NORMAL_DUCTAL_VS_LOBULAR_UP            | 68  | 34        |
| V\$AP2_Q3                                                | 251 | 194       |
| V\$AP2_Q6                                                | 258 | 184       |
| V\$AP2_Q6_01                                             | 272 | 192       |
| V\$AP2GAMMA_01                                           | 250 | 179       |
| V\$HMGY_Q6                                               | 248 | 174       |
| V\$STAT1_02                                              | 252 | 174       |
| V\$STAT1_03                                              | 248 | 174       |
| VANTVEER_BREAST_CANCER_BRCA1_DN                          | 44  | 29        |
| VANTVEER_BREAST_CANCER_BRCA1_UP                          | 36  | 30        |
| VANTVEER_BREAST_CANCER_ESR1_DN                           | 240 | 185       |
| VANTVEER_BREAST_CANCER_ESR1_UP                           | 167 | 111       |
| VANTVEER_BREAST_CANCER_METASTASIS_DN                     | 121 | 84        |
| VANTVEER_BREAST_CANCER_METASTASIS_UP                     | 56  | 34        |
| VANTVEER_BREAST_CANCER_POOR_PROGNOSIS                    | 55  | 32        |
| VETTER_TARGETS_OF_PRKCA_AND_ETS1_DN                      | 16  | 10        |
| VETTER_TARGETS_OF_PRKCA_AND_ETS1_UP                      | 16  | 12        |
| WANG_METASTASIS_OF_BREAST_CANCER                         | 15  | 9         |
| WANG_METASTASIS_OF_BREAST_CANCER_ESR1_DN                 | 30  | 22        |
| WANG_METASTASIS_OF_BREAST_CANCER_ESR1_UP                 | 22  | 17        |
| WANG_METHYLATED_IN_BREAST_CANCER                         | 35  | 32        |
| WILLIAMS_ESR1_TARGETS_DN                                 | 6   | Rejected! |
| WILLIAMS_ESR1_TARGETS_UP                                 | 26  | 22        |
| WILLIAMS_ESR2_TARGETS_DN                                 | 11  | 8         |
| WILLIAMS_ESR2_TARGETS_UP                                 | 28  | 23        |
| WILSON_PROTEASES_AT_TUMOR_BONE_INTERFACE_DN              | 5   | 5         |
| WILSON_PROTEASES_AT_TUMOR_BONE_INTERFACE_UP              | 21  | 19        |
| WINTER_HYPOXIA_DN                                        | 52  | 38        |
| WINTER_HYPOXIA_METAGENE                                  | 242 | 198       |
| WINTER_HYPOXIA_UP                                        | 92  | 61        |
| WONG_MITOCHONDRIA_GENE_MODULE                            | 217 | 178       |
| WONG_PROTEASOME_GENE_MODULE                              | 49  | 42        |
| ZHANG_BREAST_CANCER_PROGENITORS_DN                       | 145 | 104       |
| ZHANG_BREAST_CANCER_PROGENITORS_UP                       | 425 | 308       |
| ZHU_SKIL_TARGETS_DN                                      | 9   | 9         |
| ZHU_SKIL_TARGETS_UP                                      | 20  | 17        |
| ZUCCHI_METASTASIS_DN                                     | 44  | 36        |
| ZUCCHI_METASTASIS_UP                                     | 43  | 36        |
