# Supplementary material for: Analysis of high fat diet induced genes during mammary gland development: identifying role players in poor prognosis of breast cancer
Source: PubMed Central journal article supplement (PMC4153917; doi:10.1186/1756-0500-7-543), 2014-08-18
Supplement: 13104_2014_3097_MOESM2_ESM.pdf [file 13104_2014_3097_MOESM2_ESM.pdf]

Additional File 2. 53 Luminal Breast Cancer Gene Sets that were Utilized in GSEA

| NAME                                            | ORIGINAL SIZE | AFTER RESTRICTING TO DATASET | STATUS    |
|-------------------------------------------------|---------------|------------------------------|-----------|
| BERTUCCI_MEDULLARY_VS_DUCTAL_BREAST_CANCER_DN   | 169           | 119                          |           |
| BERTUCCI_MEDULLARY_VS_DUCTAL_BREAST_CANCER_UP   | 206           | 142                          |           |
| CHARAFE_BREAST_CANCER_BASAL_VS_MESENCHYMAL_DN   | 50            | 35                           |           |
| CHARAFE_BREAST_CANCER_BASAL_VS_MESENCHYMAL_UP   | 121           | 76                           |           |
| CHARAFE_BREAST_CANCER_LUMINAL_VS_BASAL_DN       | 455           | 337                          |           |
| CHARAFE_BREAST_CANCER_LUMINAL_VS_BASAL_UP       | 380           | 230                          |           |
| CHARAFE_BREAST_CANCER_LUMINAL_VS_MESENCHYMAL_DN | 460           | 325                          |           |
| CHARAFE_BREAST_CANCER_LUMINAL_VS_MESENCHYMAL_UP | 450           | 293                          |           |
| FARMER_BREAST_CANCER_APOCRINE_VS_BASAL          | 330           | 245                          |           |
| FARMER_BREAST_CANCER_APOCRINE_VS_LUMINAL        | 326           | 235                          |           |
| FARMER_BREAST_CANCER_BASAL_VS_LUMINAL           | 330           | 241                          |           |
| FARMER_BREAST_CANCER_CLUSTER_1                  | 44            | 25                           |           |
| FARMER_BREAST_CANCER_CLUSTER_2                  | 33            | 30                           |           |
| FARMER_BREAST_CANCER_CLUSTER_4                  | 16            | 14                           |           |
| FARMER_BREAST_CANCER_CLUSTER_5                  | 19            | 18                           |           |
| FARMER_BREAST_CANCER_CLUSTER_6                  | 16            | 14                           |           |
| FARMER_BREAST_CANCER_CLUSTER_7                  | 20            | 13                           |           |
| FARMER_BREAST_CANCER_CLUSTER_8                  | 7             |                              | Rejected! |
| FINETTI_BREAST_CANCER_KINOME_GREEN              | 16            | 15                           |           |
| FINETTI_BREAST_CANCER_KINOME_RED                | 16            | 15                           |           |
| FINETTI_BREAST_CANCERS_KINOME_BLUE              | 21            | 17                           |           |
| FINETTI_BREAST_CANCERS_KINOME_GRAY              | 15            | 13                           |           |
| HOWLIN_CITED1_TARGETS_1_DN                      | 37            | 29                           |           |
| HOWLIN_CITED1_TARGETS_1_UP                      | 35            | 25                           |           |
| HOWLIN_CITED1_TARGETS_2_DN                      | 17            | 16                           |           |
| HOWLIN_CITED1_TARGETS_2_UP                      | 17            | 16                           |           |
| HOWLIN_PUBERTAL_MAMMARY_GLAND                   | 69            | 60                           |           |
| HUPER_BREAST_BASAL_VS_LUMINAL_DN                | 59            | 43                           |           |
| HUPER_BREAST_BASAL_VS_LUMINAL_UP                | 54            | 38                           |           |
| LIM_MAMMARY_LUMINAL_MATURE_DN                   | 99            | 82                           |           |
| LIM_MAMMARY_LUMINAL_MATURE_UP                   | 116           | 85                           |           |
| LIM_MAMMARY_LUMINAL_PROGENITOR_DN               | 14            | 11                           |           |
| LIM_MAMMARY_LUMINAL_PROGENITOR_UP               | 58            | 49                           |           |
| LIM_MAMMARY_STEM_CELL_DN                        | 428           | 308                          |           |
| LIM_MAMMARY_STEM_CELL_UP                        | 489           | 372                          |           |
| SMID_BREAST_CANCER_BASAL_DN                     | 701           | 476                          |           |
| SMID_BREAST_CANCER_BASAL_UP                     | 648           | 493                          |           |
| SMID_BREAST_CANCER_ERBB2_DN                     | 5             |                              | Rejected! |
| SMID_BREAST_CANCER_ERBB2_UP                     | 147           | 98                           |           |
| SMID_BREAST_CANCER_LUMINAL_A_DN                 | 18            | 15                           |           |
| SMID_BREAST_CANCER_LUMINAL_A_UP                 | 84            | 63                           |           |
| SMID_BREAST_CANCER_LUMINAL_B_DN                 | 564           | 412                          |           |
| SMID_BREAST_CANCER_LUMINAL_B_UP                 | 172           | 121                          |           |
| SMID_BREAST_CANCER_NORMAL_LIKE_DN               | 6             | 5                            |           |
| SMID_BREAST_CANCER_NORMAL_LIKE_UP               | 476           | 348                          |           |
| SMID_BREAST_CANCER_RELAPSE_IN_BONE_DN           | 315           | 238                          |           |
| SMID_BREAST_CANCER_RELAPSE_IN_BONE_UP           | 97            | 64                           |           |
| SMID_BREAST_CANCER_RELAPSE_IN_BRAIN_DN          | 85            | 58                           |           |
| SMID_BREAST_CANCER_RELAPSE_IN_BRAIN_UP          | 39            | 37                           |           |
| SMID_BREAST_CANCER_RELAPSE_IN_LIVER_DN          | 10            | 10                           |           |
| SMID_BREAST_CANCER_RELAPSE_IN_LIVER_UP          | 6             | 6                            |           |
| SMID_BREAST_CANCER_RELAPSE_IN_LUNG_DN           | 37            | 25                           |           |
| SMID_BREAST_CANCER_RELAPSE_IN_LUNG_UP           | 21            | 18                           |           |
| SMID_BREAST_CANCER_RELAPSE_IN_PLEURA_DN         | 27            | 16                           |           |
| SMID_BREAST_CANCER_RELAPSE_IN_PLEURA_UP         | 6             | 6                            |           |
