# Supplementary material for: Analysis of high fat diet induced genes during mammary gland development: identifying role players in poor prognosis of breast cancer
Source: PubMed Central journal article supplement (PMC4153917; doi:10.1186/1756-0500-7-543), 2014-08-18

# Subtype

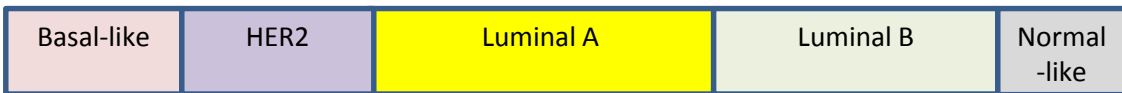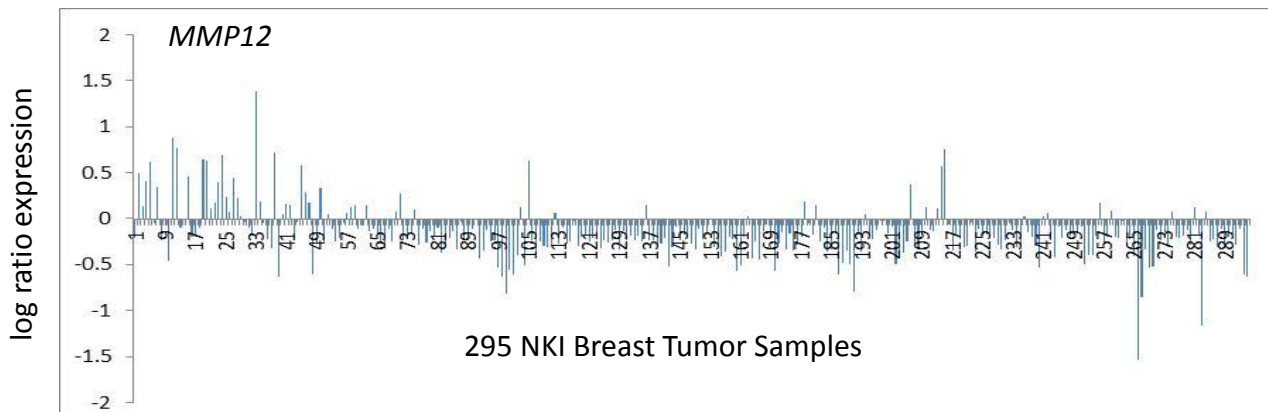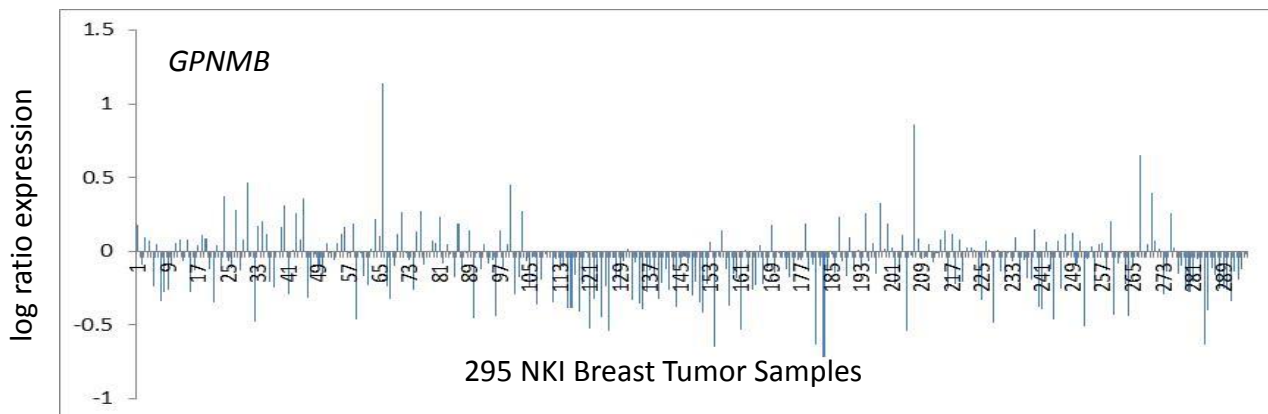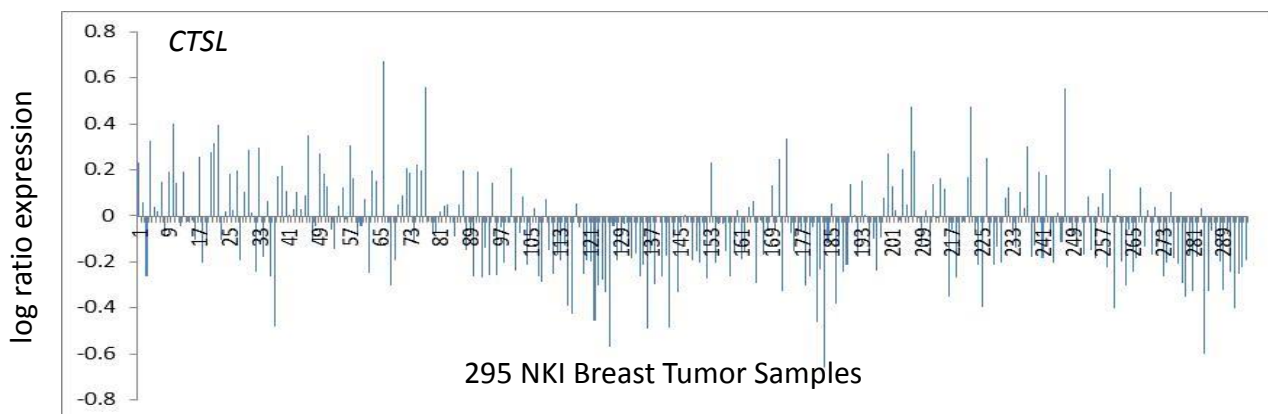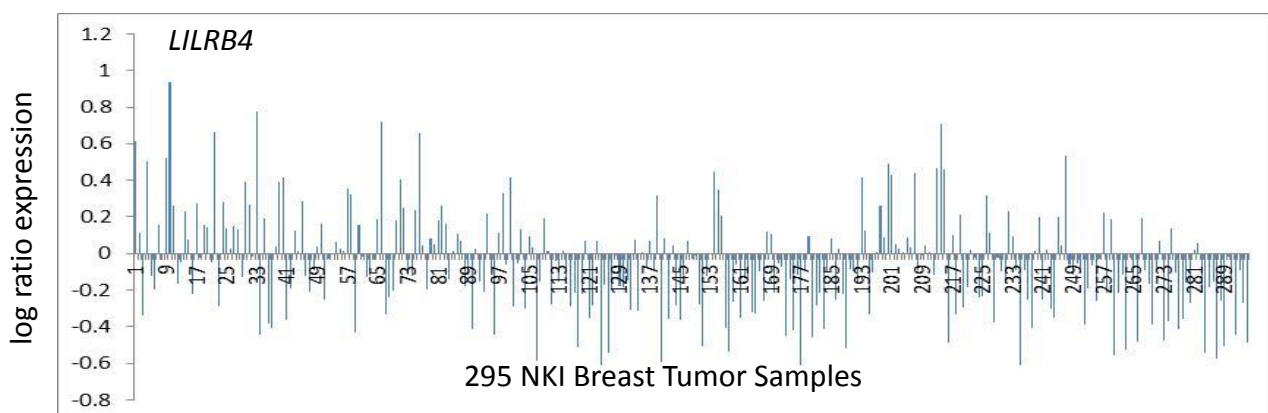

Supplement: 13104_2014_3097_MOESM3_ESM.pdf [file 13104_2014_3097_MOESM3_ESM.pdf]
